# Supplementary material
Source: PubMed Central journal article supplement (PMC7864895)
Supplement: NIHMS1655221-supplement-1.pdf [file NIHMS1655221-supplement-1.pdf]

# Supplementary Figure S1

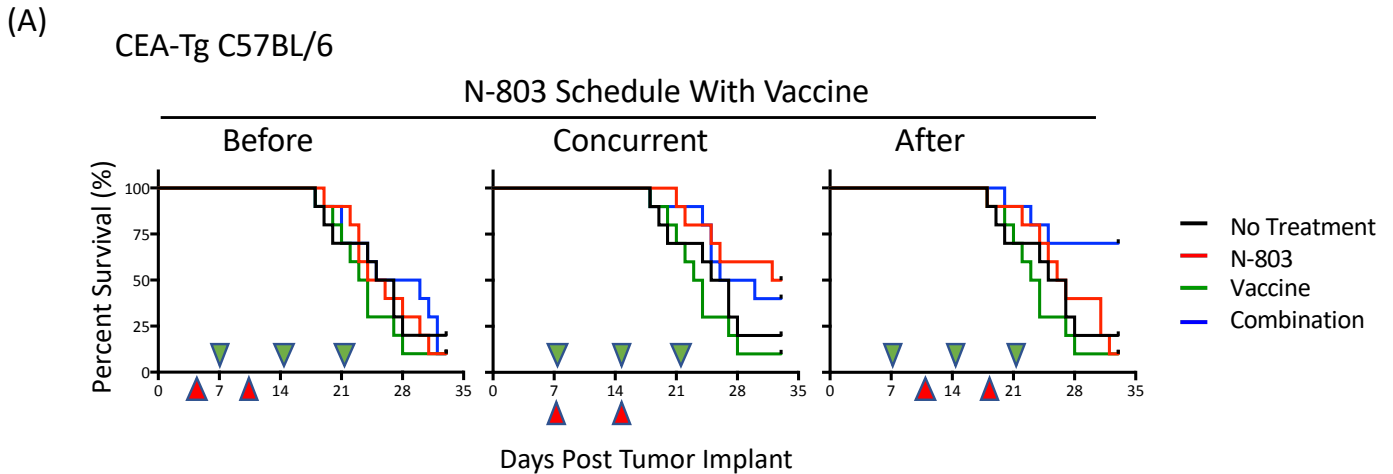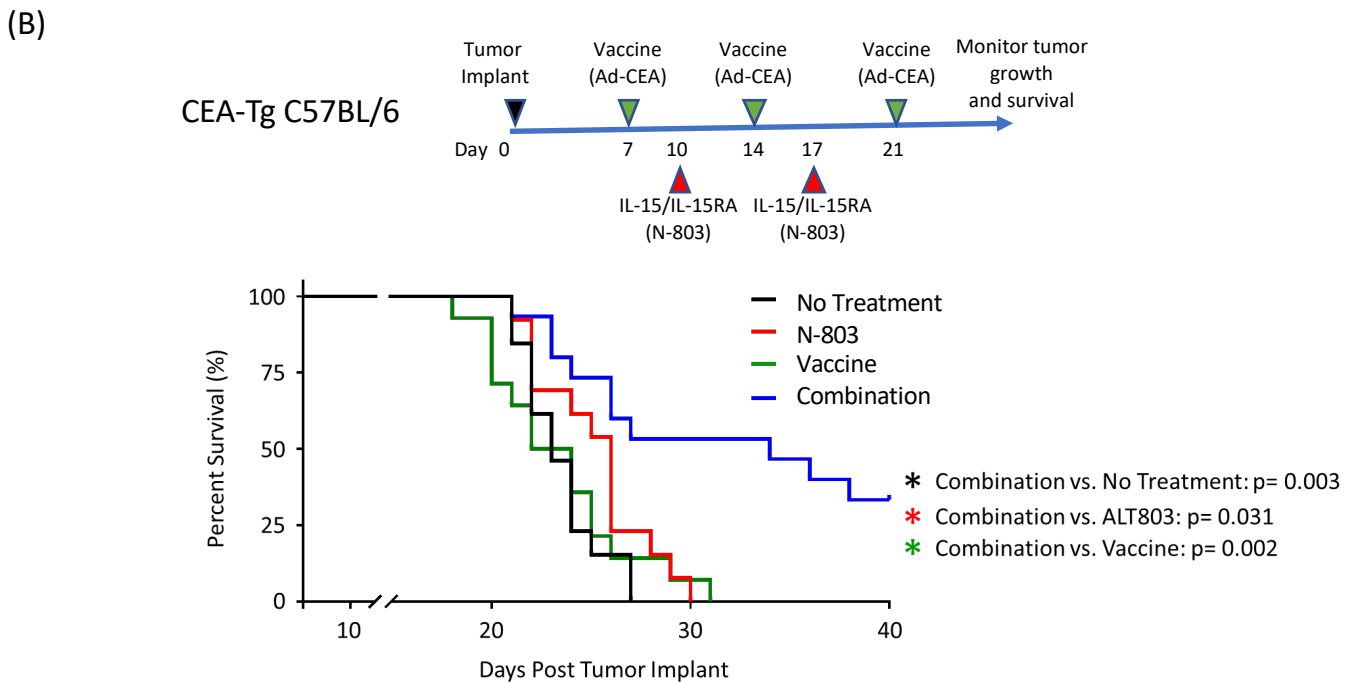

## Supplemental Figure 1.

### Timing of N-803 in relation to vaccine is crucial to antitumor activity and overall survival in a self-antigen CEA-Tg tumor model.

**(A)** CEA-Tg C57BL/6 mice ( $n=10/\text{group}$ ) were implanted on day 0 with MC38-CEA tumor cells. Mice were administered Ad-CEA vaccine (red triangles) on days 7, 14 and 21. Subgroups were administered N-803 (green triangles) either before vaccine (on days 4, and 11), concurrent with vaccine (days 7 and 14), or after vaccine (days 10 and 17). Depicted are Kaplan-Meier survival curves. **(B)** N-803 administered after vaccine significantly improves overall survival. CEA-Tg C57BL/6 mice ( $n=10/\text{group}$ ) were implanted on day 0 with MC38-CEA tumor cells. Mice were administered Ad-CEA vaccine on days 7, 14 and 21. N-803 was administered after vaccine (days 10 and 17). Depicted are Kaplan-Meier survival curves.

Supplementary Figure S2

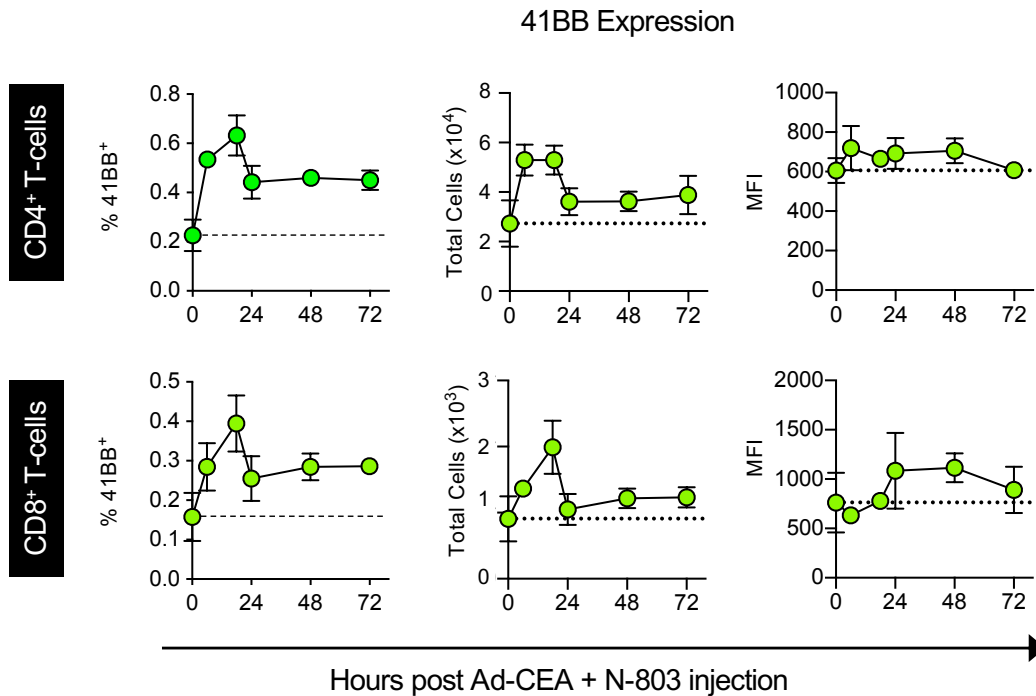

**Supplemental Figure 2. The combination of Ad-CEA and N-803 temporally upregulates 4-1BB expression in CD4<sup>+</sup> and CD8<sup>+</sup> splenocytes.** Naive female C57BL/6-CEA-Tg mice were injected concurrently with Ad-CEA (s.c.) and N-803 (s.c.). Spleens were collected 0, 8, 18, 24, 48, and 72 hours after the injection. Frequency, total cell number, and MFI of 4-1BB on CD4<sup>+</sup> and CD8<sup>+</sup> splenocytes were analyzed via flow cytometry. s.c., subcutaneous.

## Supplementary Figure S3

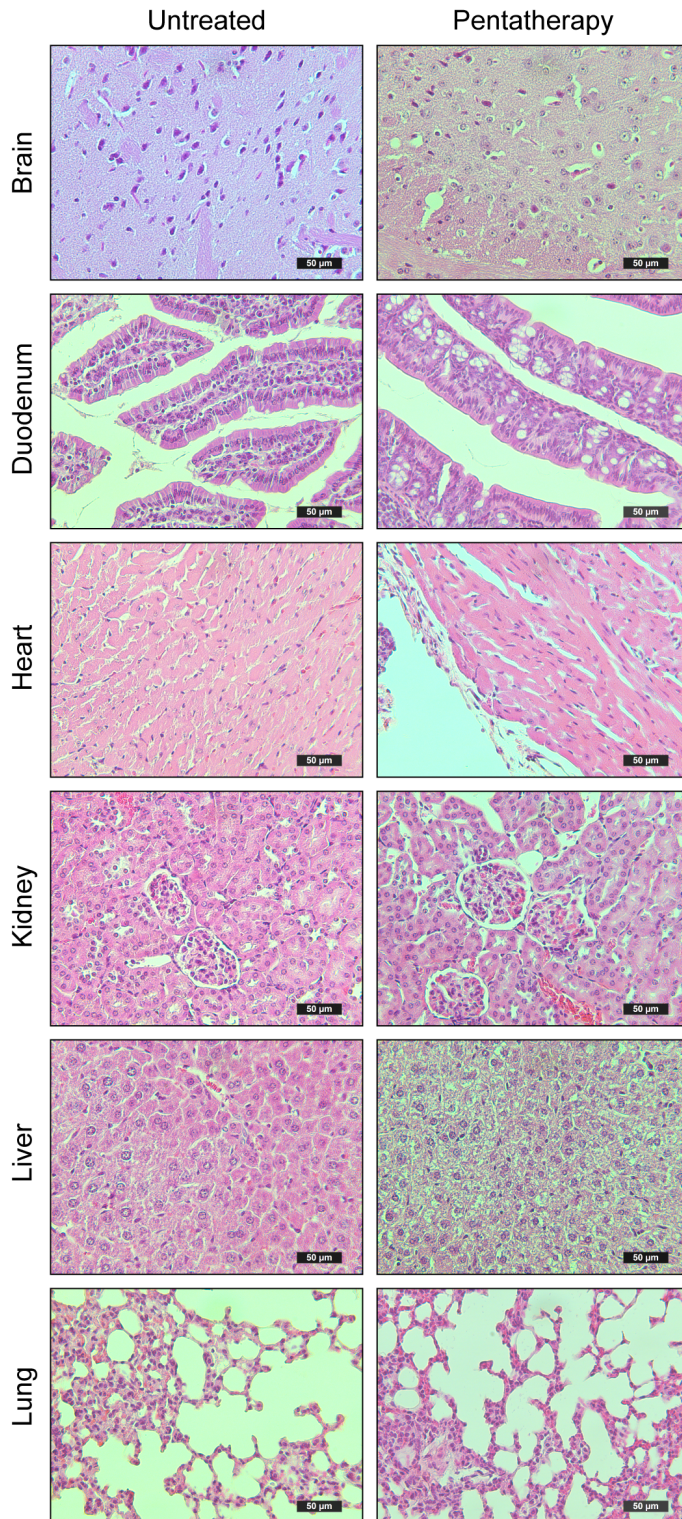

**Supplementary Figure S3.**  
**Histopathology of organ tissues show minimal toxicity in the MC38-CEA-bearing mice treated with the Ad-CEA, N-803, OX40, GITR, an IDOi combination (pentathery).**

Brain, duodenum, heart, kidney, liver, and lungs were collected from MC38-CEA-bearing mice in the untreated and pentathery-treated cohorts. H&E slides were prepared and examined for abnormalities and signs of combination-related toxicities. H&E, hematoxylin and eosin.

## Supplementary Table S1

| Test                      | Normal ranges | None <sup>a</sup><br>(n = 5) | Pentatherapy <sup>b</sup><br>(n = 5) |
|---------------------------|---------------|------------------------------|--------------------------------------|
| Weight (g) <sup>c</sup>   | 18-26         | 25.3± 2.1                    | 24.5 ± 2.2                           |
| Blood assays <sup>d</sup> |               |                              |                                      |
| WBC (K/ul)                | 5.3-14.8      | 6.2                          | 7.2                                  |
| LY (K/ul)                 | 3.5-11.7      | 5.1                          | 4.5                                  |
| MO (K/ul)                 | 0.3-1.4       | 0.3                          | 0.3                                  |
| EO (K/ul)                 | 0.01-0.3      | 0.10                         | 0.12                                 |
| BA (K/ul)                 | 0.0-0.2       | 0.02                         | 0.01                                 |
| LY (%)                    | 53.0-84.2     | 55.4                         | 55.1                                 |
| MO (%)                    | 3.7-14.6      | 5.2                          | 4.5                                  |
| EO (%)                    | 0.1-4.0       | 3.3                          | 2.0                                  |
| BA (%)                    | 0.0-1.6       | 0.7                          | 0.3                                  |
| RBC (M/ul)                | 8.0-11.8      | 10.3                         | 7.6                                  |
| Hb (g/dl)                 | 12.6-19.2     | 15.3                         | 12                                   |
| HCT (%)                   | 43.5-67.3     | 50.3                         | 61.4                                 |
| MCV (fl)                  | 50.8-64.2     | 58.9                         | 56.9                                 |
| PLT (K/ul)                | 390-1633      | 834                          | 780                                  |
| Serum assays <sup>e</sup> |               |                              |                                      |
| BUN (mg/dl)               | 6-32          | 17                           | 14                                   |
| CRE (mg/dl)               | 0.2-0.7       | 0.1                          | 0.1                                  |
| AST (u/l)                 | 67-393        | 269                          | 366                                  |
| ALT (u/l)                 | 35-172        | 85                           | 133                                  |
| ALK (u/l)                 | 65-399        | 74                           | 130                                  |
| TPR (g/dl)                | 4.9-7.8       | 5.5                          | 6.4                                  |

Twelve week-old CEA-Tg mice were implanted with MC38-CEA tumors on day 0. Mice received <sup>a</sup>no treatment or were treated with <sup>b</sup>anti-GITR on day 5, vaccine (ad-CEA), N803, and anti-OX40 on days 7, 14, and 21, and daily epacadostat (in chow) beginning on day 7 (pentatherapy). <sup>c</sup>Weights were measured on day 28. <sup>d</sup>Blood was drawn on day 28 and equal-volume pooled. <sup>e</sup>Serum was drawn on day 28 and equal-volume pooled.

**Supplementary Table S1.**  
**Blood analysis show minimal toxicity in the MC38-CEA-bearing mice treated with the Ad-CEA, N-803, OX40, GITR, and IDOi combination (pentatherapy).**  
 Blood and serum were collected and pooled from pentatherapy-treated animals (n=3) and analyzed for blood cells and liver enzymes, respectively.
